# Supplementary material for: Vitamin D Deficiency Promotes Liver Tumor Growth in Transforming Growth Factor-β/Smad3-Deficient Mice Through Wnt and Toll-like Receptor 7 Pathway Modulation
Source: PubMed Central journal article supplement (PMC4960540; doi:10.1038/srep30217), 2016-07-26
Supplement: srep30217-s1.pdf [file srep30217-s1.pdf]

# **Vitamin D Deficiency Promotes Liver Tumor Growth in Transforming Growth Factor- $\beta$ /Smad3-Deficient Mice through Wnt and Toll-like Receptor 7 Pathway Modulation**

Jian Chen, Lior H. Katz, Nina M. Muñoz, Shoujun Gu, Ji-hyun Shin, Wilma S. Jogunoori, Mi-Hye Lee, Mitchell D. Belkin, Sang-Bae Kim, Jon C White, Jaclyn Andricovich, Alexandros Tzatsos, Shulin Li, Sang Soo Kim, Kirti Shetty, Bibhuti Mishra, Asif Rashid, Ju-Seog Lee and Lopa Mishra\*

**Supplementary Figure S1. Multiple genes are altered in *Smad3*<sup>+/-</sup> and low-VD fed mice.** Heatmap showing microarray results from liver tissue of wild-type or *Smad3*<sup>+/-</sup> mice fed with either a low-VD or a high-VD diet (cutoff: standard deviation < 0.4; final number of probes, 4,694). Represent genes were shown in Cluster 3, 4 and 5.

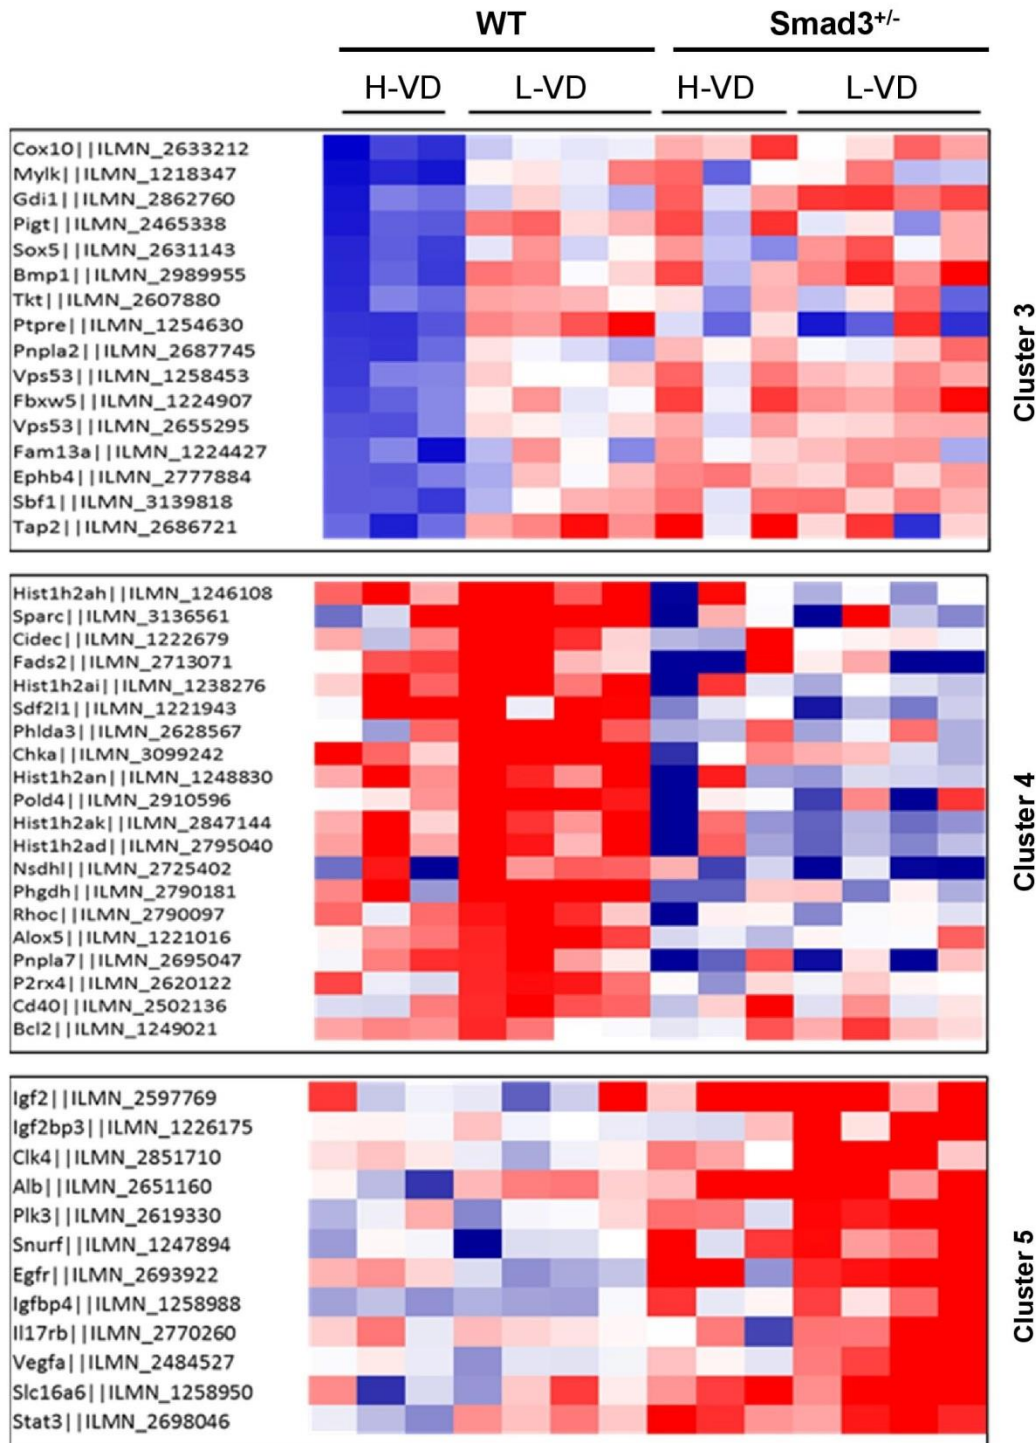

**Supplementary Figure S2. Loss of VDR/Smad3 increased levels of nuclear  $\beta$ -catenin.**  $\beta$ -catenin nuclear localization intensity was measured by immunofluorescence staining with phospho- $\beta$ -catenin antibodies and DAPI. HepG2 cells were transfected with lentiviral shRNA for Smad3 (a), or transfected with siRNA for VDR (b). The nuclear localization intensity of  $\beta$ -catenin was measured with MetaMorph image analysis software. Bar graph presents mean staining intensities. (\*\*  $P < 0.001$ , Student's t-test.)

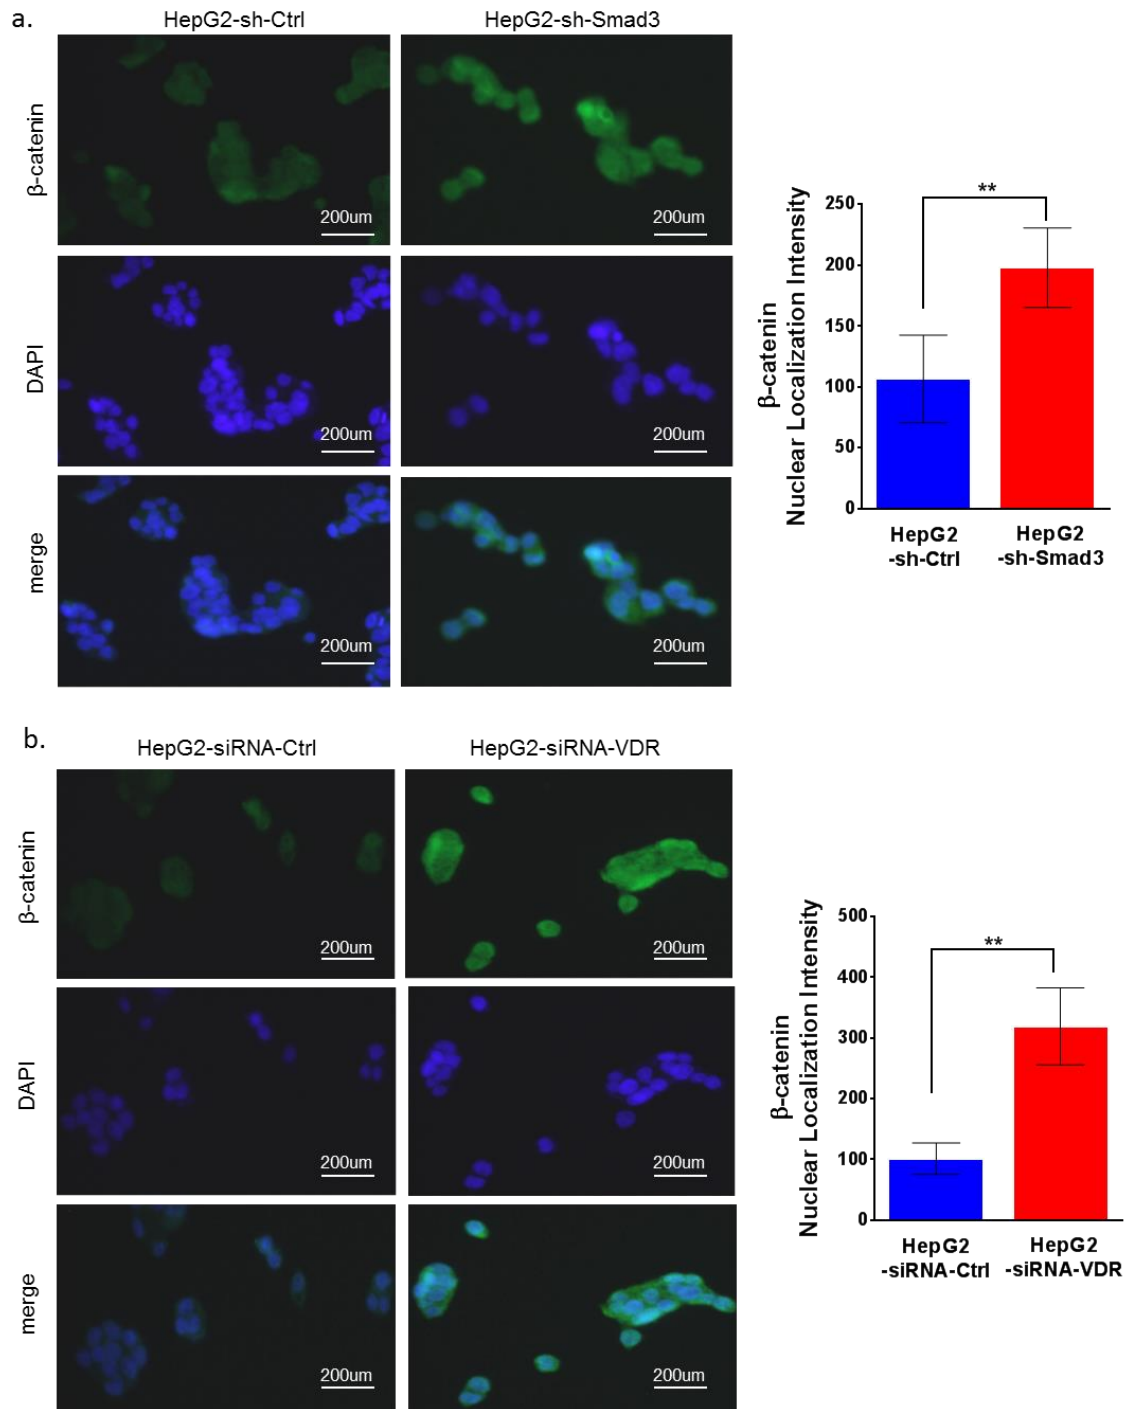

**Supplementary Table S1. Tables of liver-to-body weight ratio, liver tumor number and lung tumor number.**

**Liver Tumor Number**

|                             | <b>P value</b> | <b>Low VD</b> | <b>High VD</b> | <b>Difference</b> |
|-----------------------------|----------------|---------------|----------------|-------------------|
| Wild type                   | 0.078          | 11.0          | 5.0            | 6.0               |
| <i>Smad3</i> <sup>+/-</sup> | 0.605          | 7.4           | 6.1            | 1.3               |

**Liver-to-Body Weight Ratio**

|                             | <b>P value</b> | <b>Low VD</b> | <b>High VD</b> | <b>Low/High</b> |
|-----------------------------|----------------|---------------|----------------|-----------------|
| Wild type                   | 0.721          | 8.721%        | 7.671%         | 1.137           |
| <i>Smad3</i> <sup>+/-</sup> | 0.028          | 18.366%       | 6.248%         | 2.940           |

**Lung Tumor Number**

|                             | <b>P value</b> | <b>Low VD</b> | <b>High VD</b> | <b>Difference</b> |
|-----------------------------|----------------|---------------|----------------|-------------------|
| Wild type                   | 0.341          | 4.6           | 3.625          | 0.975             |
| <i>Smad3</i> <sup>+/-</sup> | 0.324          | 4.5           | 6.188          | -1.688            |
